# Supplementary material
Source: HighWire-hosted journal article supplement (https://www.cmaj.ca/highwire/filestream/150371/field_highwire_adjunct_files/0/231358-res-1-at.pdf)
Supplement: 231358-res-1-at.pdf [file 231358-res-1-at.pdf]

## **Appendix 1: Ontario's five long-term follow-up clinics for adult survivors of childhood cancer and pediatric cancer centres**

### **Long-term follow-up clinics**

The Ottawa Hospital Cancer Centre, Ottawa

Kingston Health Sciences Centre, Kingston General Hospital Site, Kingston

Princess Margaret Cancer Centre, Toronto

McMaster Children's Hospital, Hamilton Health Sciences, Hamilton

Children's Hospital, London Health Sciences Centre, London

### **Pediatric cancer centres**

Children's Hospital, London, Ontario

Children's Hospital of Eastern Ontario, Ottawa, Ontario

Kingston General Hospital, Kingston, Ontario

McMaster Children's Hospital, Hamilton, Ontario

The Hospital for Sick Children, Toronto, Ontario
